# Supplementary material for: Highly improved supercapacitance properties of MnFe2O4 nanoparticles by MoS2 nanosheets
Source: Research Square preprint supplement (doi:10.21203/rs.3.rs-132314/v1), 2020-12-28
Supplement: Supplementary file 1 [file d7022a97d49afbefb8ba77d4.docx]

**Highly improved supercapacitance properties of MnFe2O4 nanoparticles by MoS2 nanosheets**

**Samira Sharifi, Kourosh Rahimi, and Ahmad Yazdani***

Condensed Matter Physics Group, Department of Basic Sciences, Tarbiat Modares University, Jalal-Ale-Ahmad Avenue, Tehran, Iran.

*Corresponding author: yazdania@modares.ac.ir

Figure S1 presents a graphical abstract of the research highlights.


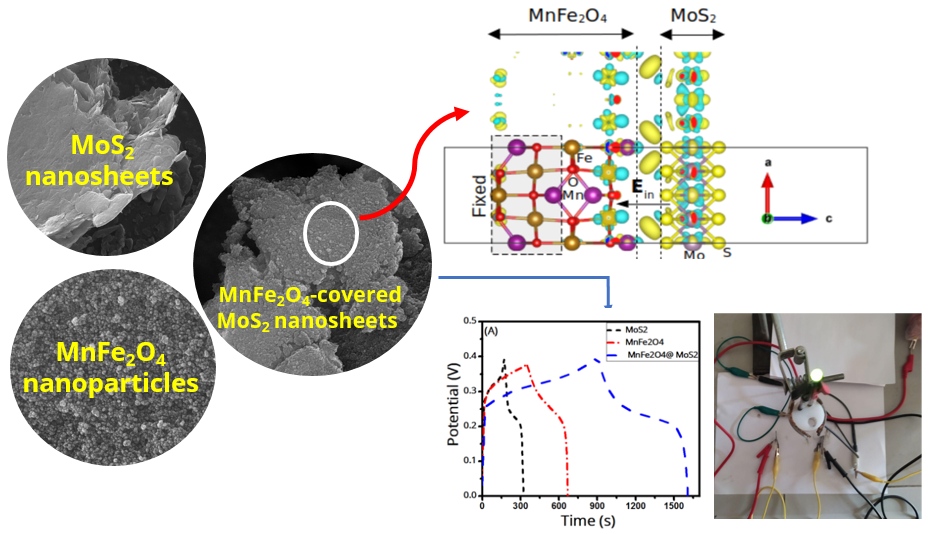


**Figure S1.** Graphical abstract of the research
